# Supplementary material for: Stable Isotope Analyses Reveal Impact of Fe and Zn on Cd Uptake and Translocation by Theobroma cacao
Source: MDPI journal article supplement (doi:10.3390/plants13040551), 2024-02-17
Supplement: s1 [file s1]

## **Supplementary Information**

To:

### **Stable isotope analyses reveal impact of Fe and Zn on Cd uptake and translocation by *Theobroma cacao***

Rebekah E. T. Moore<sup>a</sup>, Ihsan Ullah<sup>b</sup>, Jim M. Dunwell<sup>b</sup>, Mark Rehkämper<sup>a</sup>

<sup>a</sup>Department of Earth Science and Engineering, Imperial College London, London SW7 2BP,  
UK

<sup>b</sup>School of Agriculture, Policy and Development, University of Reading, Reading RG6 6EU,  
UK

**Table S1:** Composition of the half-strength Hoagland solutions with additional CdCl<sub>2</sub> for the eight treatments

| With additional CdCl <sub>2</sub> for the eight treatments |                                |                    |                      |               |
|------------------------------------------------------------|--------------------------------|--------------------|----------------------|---------------|
| Component                                                  | Species                        | Concentration      |                      | Treatment #   |
|                                                            |                                | mg L <sup>-1</sup> | μmol L <sup>-1</sup> |               |
| Major nutrients                                            |                                |                    |                      |               |
| KH <sub>2</sub> PO <sub>4</sub>                            | K <sup>+</sup>                 | 19.55              | 500                  | All           |
|                                                            | PO <sub>4</sub> <sup>3-</sup>  | 47.49              | 500                  | All           |
|                                                            | H <sup>+</sup>                 | 2.002              | 1000                 | All           |
| KNO <sub>3</sub>                                           | K <sup>+</sup>                 | 97.75              | 2500                 | All           |
|                                                            | NO <sub>3</sub> <sup>-</sup>   | 155.0              | 2500                 | All           |
| Ca(NO <sub>3</sub> ) <sub>2</sub> ·4H <sub>2</sub> O       | Ca <sub>2</sub> <sup>+</sup>   | 100.2              | 2500                 | All           |
|                                                            | NO <sub>3</sub> <sup>-</sup>   | 310.0              | 5000                 | All           |
| MgSO <sub>4</sub> ·7H <sub>2</sub> O                       | Mg <sup>2+</sup>               | 24.31              | 1000                 | All           |
|                                                            | SO <sub>4</sub> <sup>2-</sup>  | 96.07              | 1000                 | All           |
| Micronutrients                                             |                                |                    |                      |               |
| H <sub>3</sub> BO <sub>3</sub>                             | H <sub>3</sub> BO <sub>3</sub> | 1.430              | 23.1                 | All           |
| Fe-EDTA <sup>a,b</sup>                                     | Fe <sup>3+</sup>               | 2.383              | 42.7                 | 1, 2, 3, 6, 7 |
|                                                            | EDTA <sup>4-</sup>             | 12.30              | 42.7                 | 1, 2, 3, 6, 7 |
| MnCl <sub>2</sub> ·4H <sub>2</sub> O                       | Mn <sup>2+</sup>               | 0.253              | 4.6                  | All           |
|                                                            | Cl <sup>-</sup>                | 0.326              | 9.2                  | All           |
| ZnSO <sub>4</sub> ·7H <sub>2</sub> O <sup>a</sup>          | Zn <sup>2+</sup>               | 0.025              | 0.38                 | 1, 2, 3, 4, 5 |
|                                                            | SO <sub>4</sub> <sup>2-</sup>  | 0.037              | 0.38                 | 1, 2, 3, 4, 5 |
| CuSO <sub>4</sub> ·5H <sub>2</sub> O                       | Cu <sup>2+</sup>               | 0.010              | 0.2                  | All           |
|                                                            | SO <sub>4</sub> <sup>2-</sup>  | 0.015              | 0.2                  | All           |
| Na <sub>2</sub> MoO <sub>4</sub> ·2H <sub>2</sub> O        | Na <sup>+</sup>                | 0.002              | 0.1                  | All           |
|                                                            | MoO <sub>4</sub> <sup>2-</sup> | 0.003              | 0.04                 | All           |
| CdCl <sub>2</sub> <sup>c</sup>                             | Cd <sup>2+</sup>               | 2.248              | 20.0                 | All           |
|                                                            | Cl <sup>-</sup>                | 2.836              | 40.0                 | All           |

<sup>a</sup>C<sub>10</sub>H<sub>12</sub>FeN<sub>2</sub>O<sub>8</sub> <sup>b</sup>After an initial 28 days in the half-strength Hoagland solution without CdCl<sub>2</sub>, the cacao seedlings were grown in eight different solutions for 14 days. These solutions included or excluded Fe-EDTA and ZnSO<sub>4</sub>. <sup>c</sup>The CdCl<sub>2</sub> was present in all eight final solutions but excluded from the solutions used for the initial 28 days.

**Table S2:** Cadmium concentrations and isotope compositions (relative to NIST SRM 3108 Cd) obtained for reference and quality control materials and comparison with literature data

| Material       | Type          | n | [Cd] ± sd<br>μg g <sup>-1</sup> | δ <sup>114/110</sup> Cd ± 2sd<br>‰ | Reference         |
|----------------|---------------|---|---------------------------------|------------------------------------|-------------------|
| BAM-I012       | Cd Solution   | 4 | -                               | <b>-1.32±0.06</b>                  | <b>This study</b> |
|                |               |   | -                               | -1.33±0.04                         | [1]               |
|                |               |   | -                               | -1.32±0.06                         | [2]               |
|                |               |   | -                               | -1.33±0.06                         | [3]               |
| NIST SRM 1570a | Spinach Leaf  | 2 | <b>2.76±0.02</b>                | <b>0.47±0.03</b>                   | <b>This study</b> |
|                |               |   | 2.87±0.06                       | -                                  | Certificate       |
|                |               |   | 2.71±0.01                       | 0.44±0.06                          | [2]               |
|                |               |   | -                               | 0.47±0.03                          | [3]               |
|                |               |   | 2.87±0.02                       | 0.45±0.05                          | [4]               |
| BCR-679        | White Cabbage | 1 | <b>1.69</b>                     | <b>0.22±0.04</b>                   | <b>This study</b> |
|                |               |   | 1.66±0.07                       | -                                  | Certificate       |
|                |               |   | 1.77±0.05                       | 0.22±0.02                          | [5]               |

**Table S3:** Percentages of species present in the hydroponic solutions with or without Fe-EDTA and ZnSO<sub>4</sub>, calculated using Visual MINTEQ 3.1

| Species <sup>a</sup>                            | Fe-EDTA + ZnSO <sub>4</sub> | Fe-EDTA | ZnSO <sub>4</sub> | Neither |
|-------------------------------------------------|-----------------------------|---------|-------------------|---------|
| Cd <sup>2+</sup>                                | 87.7                        | 87.1    | 88.3              | 88.3    |
| CdCl <sup>+</sup>                               | 0.46                        | 0.46    | 0.46              | 0.46    |
| CdSO <sub>4</sub> (aq)                          | 6.20                        | 6.16    | 6.25              | 6.24    |
| Cd(SO <sub>4</sub> ) <sub>2</sub> <sup>2-</sup> | 0.07                        | 0.06    | 0.07              | 0.07    |
| CdNO <sub>3</sub> <sup>+</sup>                  | 1.24                        | 1.24    | 1.25              | 1.25    |
| CdHPO <sub>4</sub> (aq)                         | 3.62                        | 3.59    | 3.64              | 3.64    |
| CdEDTA <sup>2-</sup>                            | 0.66                        | 1.38    |                   |         |
| Cu <sup>2+</sup>                                | 32.5                        | 19.4    | 83.6              | 83.6    |
| CuOH <sup>+</sup>                               | 0.12                        | 0.07    | 0.31              | 0.31    |
| CuSO <sub>4</sub> (aq)                          | 2.24                        | 1.34    | 5.78              | 5.78    |
| CuNO <sub>3</sub> <sup>+</sup>                  | 0.47                        | 0.28    | 1.21              | 1.21    |
| CuHPO <sub>4</sub> (aq)                         | 3.52                        | 2.10    | 9.17              | 9.07    |
| CuEDTA <sup>2-</sup>                            | 60.3                        | 75.7    |                   |         |
| CuHEDTA <sup>-</sup>                            | 0.89                        | 1.12    |                   |         |
| Fe-EDTA <sup>-</sup>                            | 99.1                        | 99.4    |                   |         |
| FeHEDTA (aq)                                    | 0.02                        | 0.02    |                   |         |
| FeOHEDTA <sup>2-</sup>                          | 0.35                        | 0.35    |                   |         |
| Fe(OH) <sub>2</sub> <sup>+</sup>                | 0.17                        | 0.08    |                   |         |
| FeHPO <sub>4</sub> <sup>+</sup>                 | 0.36                        | 0.17    |                   |         |
| Zn <sup>2+</sup>                                | 90.8                        |         | 91.3              |         |
| ZnSO <sub>4</sub> (aq)                          | 5.97                        |         | 6.01              |         |
| Zn(SO <sub>4</sub> ) <sub>2</sub> <sup>2-</sup> | 0.04                        |         | 0.04              |         |
| ZnNO <sub>3</sub> <sup>+</sup>                  | 1.05                        |         | 1.05              |         |
| ZnHPO <sub>4</sub> (aq)                         | 1.53                        |         | 1.53              |         |
| ZnEDTA <sup>2-</sup>                            | 0.56                        |         |                   |         |
| ZnCl <sup>+</sup>                               | 0.01                        |         | 0.02              |         |
| ZnOH <sup>+</sup>                               | 0.01                        |         |                   |         |

<sup>a</sup> The speciation of other elements was not significantly changed by the addition or removal of Fe-EDTA or ZnSO<sub>4</sub> and they are therefore omitted. Fe-EDTA and ZnSO<sub>4</sub> were both present in treatments 1, 2 and 3. Fe-EDTA, but not ZnSO<sub>4</sub>, was present in treatments 6 and 7. ZnSO<sub>4</sub>, but not Fe-EDTA, was present in treatments 4 and 5. Neither were present in treatment 8.

**Table S4:** Dry masses of plant tissue samples

| <b>T</b>    | <b>Nutrient Solutions</b> |        | <b>Roots</b>          | <b>Stems</b>         | <b>Leaves</b>        | <b>Total</b>         | <b>Average Total</b> | <b>sd</b> |
|-------------|---------------------------|--------|-----------------------|----------------------|----------------------|----------------------|----------------------|-----------|
| <b>#</b>    | Hydroponic                | Foliar | g                     | g                    | g                    | g                    | g                    | g         |
| C           | Fe, Zn                    | -      | 0.10<br>0.09<br>0.09  | 0.17<br>0.20<br>0.17 | 0.38<br>0.16<br>0.72 | 0.65<br>0.45<br>0.99 | 0.69                 | 0.27      |
| 1           | Fe, Zn                    | -      | 0.11<br>0.13          | 0.16<br>0.20         | 0.36<br>0.59         | 0.63<br>0.92         | 0.78                 | 0.21      |
| 2           | Fe, Zn                    | Fe     | 0.15<br>0.11          | 0.17<br>0.19         | 0.52<br>0.70         | 0.84<br>0.99         | 0.91                 | 0.11      |
| 3           | Fe, Zn                    | Zn     | 0.10<br>0.12          | 0.17<br>0.12         | 0.69<br>0.52         | 0.96<br>0.76         | 0.86                 | 0.14      |
| 4           | Zn                        | -      | 0.09<br>0.09          | 0.11<br>0.14         | 0.36<br>0.54         | 0.56<br>0.77         | 0.67                 | 0.15      |
| 5           | Zn                        | Fe     | 0.11<br>0.10          | 0.15<br>0.14         | 0.52<br>0.36         | 0.79<br>0.59         | 0.69                 | 0.14      |
| 6           | Fe                        | -      | 0.08*<br>0.11<br>0.10 | 0.18<br>0.18<br>0.13 | 0.57<br>0.51<br>0.36 | 0.84<br>0.79<br>0.59 | 0.74                 | 0.13      |
| 7           | Fe                        | Zn     | 0.11<br>0.10          | 0.16<br>0.13         | 0.52<br>0.50         | 0.79<br>0.73         | 0.76                 | 0.04      |
| 8           | -                         | -      | 0.08<br>0.09          | 0.13<br>0.19         | 0.52<br>0.44         | 0.73<br>0.72         | 0.72                 | 0.01      |
| <b>Mean</b> |                           |        | <b>0.11</b>           | <b>0.15</b>          | <b>0.50</b>          | <b>0.76</b>          | <b>0.76</b>          | 0.12      |
| sd          |                           |        | 0.02                  | 0.03                 | 0.11                 | 0.13                 | 0.09                 | 0.06      |

T= treatment. C = control. Hydroponic solutions were half-strength Hoagland (pH 5.2) and T1-8 contained 2.25 mg L<sup>-1</sup> Cd, administered as CdCl<sub>2</sub>. Where present, the concentrations of Fe and Zn in the hydroponic solutions were 2.38 mg L<sup>-1</sup> and 25 µg L<sup>-1</sup>, respectively, and were administered as Fe-EDTA and ZnSO<sub>4</sub>. The foliar treatments were sprays of 0.1% solutions of Fe- and Zn-EDTA. \*Insufficient sample for Cd isotope composition analysis.

**Table S5:** Mass of Cd in roots, stems, leaves and total plants, translocation factors and fractions of total Cd in plant organs.

| T<br># | Nutrient Solutions |             | Cd ( $\mu\text{g}$ ) |          |           |           |           |           |            |           | TF         |           | Fraction of total Cd |             |             |             |             |             |
|--------|--------------------|-------------|----------------------|----------|-----------|-----------|-----------|-----------|------------|-----------|------------|-----------|----------------------|-------------|-------------|-------------|-------------|-------------|
|        | Hydroponic         | Foliar      | Roots                | sd       | Stems     | sd        | Leaves    | sd        | Total      | sd        | %          | sd        | Roots                | sd          | Stems       | sd          | Leaves      | sd          |
| 1      | Fe, Zn             | -           | 38.8                 | 2.4      | 51.3      | 8.7       | 52.1      | 3.1       | 142        | 9         | 268        | 47        | 0.27                 | 0.04        | 0.36        | 0.04        | 0.37        | 0.00        |
| 2      | Fe, Zn             | Fe          | 44.6                 | 10.1     | 49.5      | 9.5       | 92.8      | 17.9      | 187        | 38        | 324        | 11        | 0.24                 | 0.01        | 0.27        | 0.00        | 0.50        | 0.00        |
| 3      | Fe, Zn             | Zn          | 38.4                 | 1.1      | 36.5      | 10.8      | 66.0      | 14.6      | 141        | 24        | 268        | 74        | 0.28                 | 0.06        | 0.26        | 0.03        | 0.47        | 0.02        |
| 4      | Zn                 | -           | 44.4                 | 0.7      | 20.0      | 6.1       | 17.3      | 7.6       | 82         | 14        | 84         | 30        | 0.55                 | 0.09        | 0.24        | 0.03        | 0.21        | 0.06        |
| 5      | Zn                 | Fe          | 51.4                 | 4.8      | 29.8      | 1.6       | 19.4      | 2.7       | 101        | 0         | 96         | 17        | 0.51                 | 0.05        | 0.30        | 0.02        | 0.19        | 0.03        |
| 6      | Fe                 | -           | 39.3                 | 6.2      | 42.9      | 29.5      | 36.2      | 32.2      | 118        | 68        | 191        | 127       | 0.38                 | 0.16        | 0.35        | 0.05        | 0.27        | 0.12        |
| 7      | Fe                 | Zn          | 32.9                 | 5.4      | 43.8      | 5.9       | 45.7      | 15.6      | 122        | 27        | 270        | 21        | 0.27                 | 0.02        | 0.36        | 0.03        | 0.37        | 0.05        |
| 8      | -                  | -           | 31.6                 | 5.3      | 13.6      | 5.7       | 13.9      | 15.0      | 59         | 15        | 94         | 81        | 0.57                 | 0.24        | 0.22        | 0.04        | 0.21        | 0.20        |
|        |                    | <b>Mean</b> | <b>40</b>            | <b>5</b> | <b>36</b> | <b>10</b> | <b>43</b> | <b>14</b> | <b>118</b> | <b>22</b> | <b>199</b> | <b>51</b> | <b>0.38</b>          | <b>0.08</b> | <b>0.29</b> | <b>0.03</b> | <b>0.32</b> | <b>0.06</b> |
|        |                    | sd          | 6                    | 3        | 14        | 8         | 27        | 10        | 40         | 16        | 96         | 40        | 0.14                 | 0.08        | 0.06        | 0.02        | 0.12        | 0.07        |
|        |                    | Min         | 32                   | 1        | 14        | 2         | 14        | 3         | 59         | 0         | 84         | 11        | 0.24                 | 0.01        | 0.22        | 0.00        | 0.19        | 0.00        |
|        |                    | Max         | 51                   | 10       | 51        | 29        | 93        | 32        | 187        | 49        | 324        | 127       | 0.57                 | 0.24        | 0.36        | 0.06        | 0.50        | 0.20        |

T = treatment. Hydroponic solutions were half-strength Hoagland (pH 5.2) and contained  $2.25 \text{ mg L}^{-1}$  Cd, administered as  $\text{CdCl}_2$ . Where present, the concentrations of Fe and Zn in the hydroponic solutions were  $2.38 \text{ mg L}^{-1}$  and  $25 \mu\text{g L}^{-1}$  and were administered as Fe-EDTA and  $\text{ZnSO}_4$ . The foliar treatments were sprays of 0.1% solutions of Fe-EDTA and Zn-EDTA. Values are averages of two replicate plants per treatment. TF = translocation factor, which is calculated by dividing the total Cd in the shoots (leaves + stems) by the total Cd in the roots, multiplied by 100.

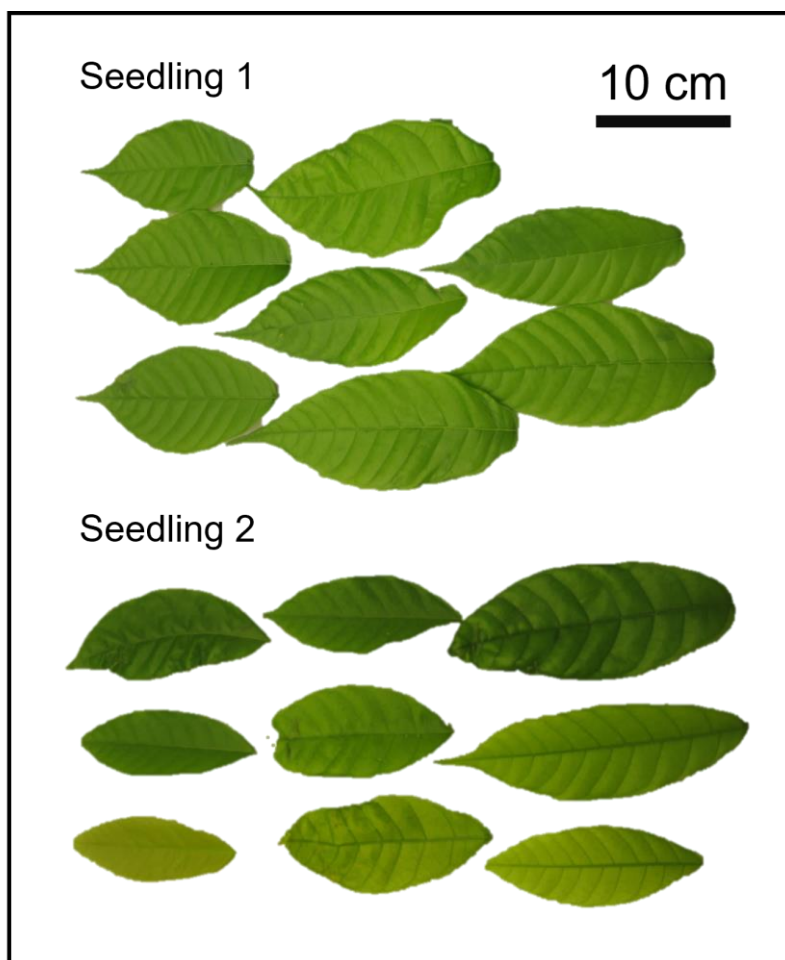

**Figure S1:** Post-harvest photograph of leaves from two cacao seedlings grown in hydroponics with the addition of 20  $\mu\text{M}$   $\text{CdCl}_2$ , at the Controlled Environment Laboratories (Reading, UK). No necrosis (death of leaf cells) or chlorosis (yellowing of the leaf from lack of chlorophyll) is evident.

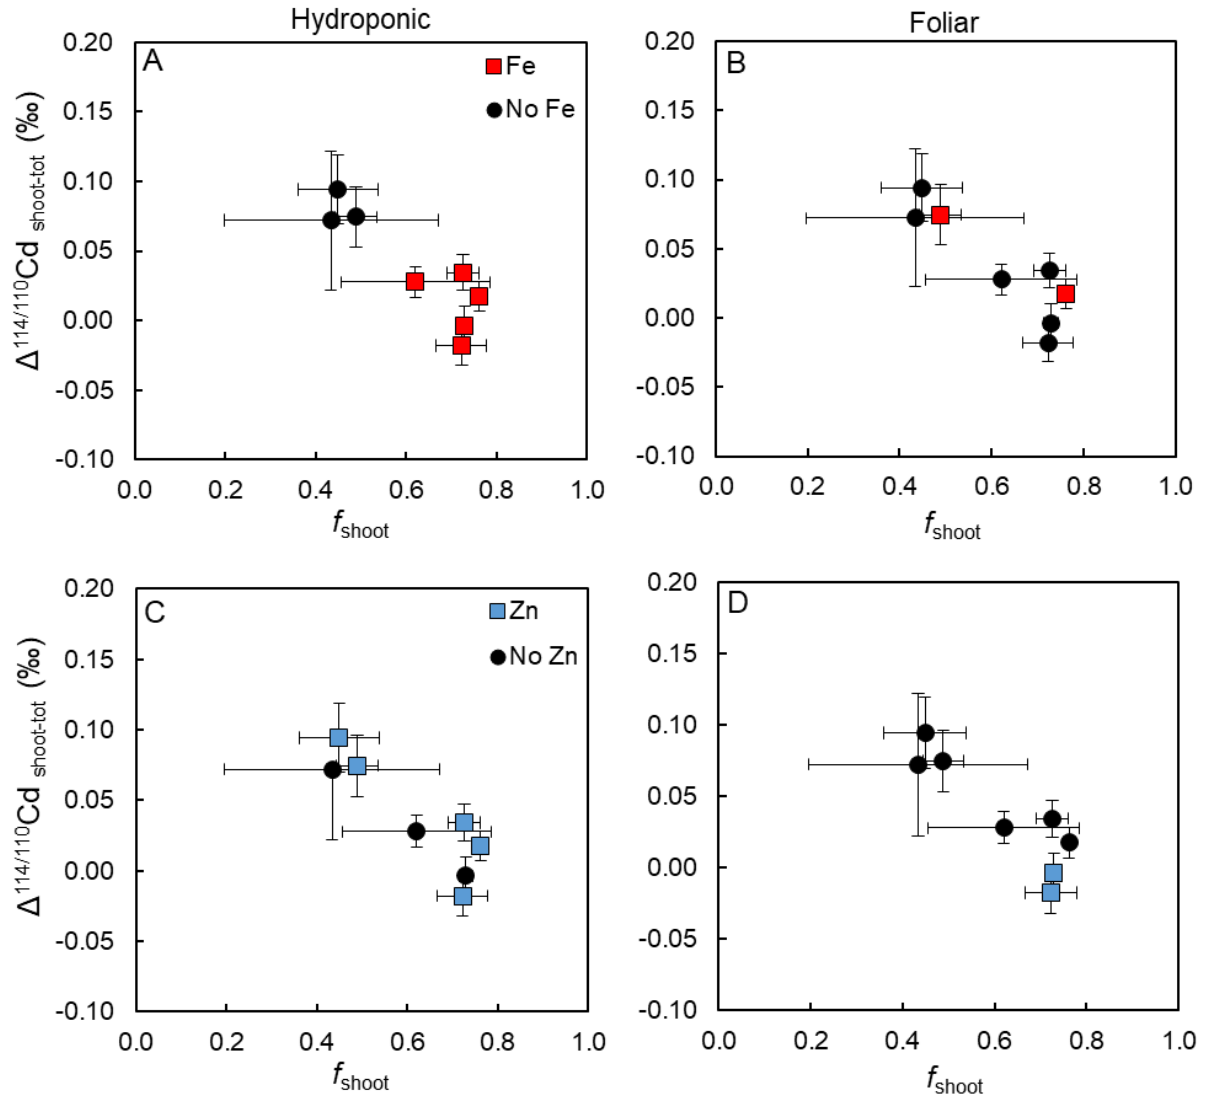

**Figure S2:** Apparent Cd isotope fractionation between shoots and total plant versus fraction ( $f$ ) of total plant Cd in these shoots. Plots A and B highlight hydroponic and foliar Fe treatments, respectively. Plots C and D highlight hydroponic and foliar Zn treatments, respectively. Values are averages of two replicates for each treatment. Average isotope compositions were calculated using inverse-variance weighting.



## References:

- [1] Abouchami, W. et al. A Common Reference Material for Cadmium Isotope Studies - NIST SRM 3108. *Geostand. Geoanalytical Res.* 37, 5–17 (2013).
- [2] Moore, R. E. T. et al. Cadmium isotope fractionation reveals genetic variation in Cd uptake and translocation by *Theobroma cacao* and role of natural resistance-associated macrophage protein 5 and heavy metal ATPase-family transporters. *Hortic. Res.* 7, 71 (2020).
- [3] Lv, W., Yin, H., Liu, M., Huang, F., Yu, H. Effect of the Dry-Ashing Method on Cadmium Isotope Measurements in Soil and Plant Samples. *Geostand. Geoanalytical Res.* 45, 1–12 (2020).
- [4] Borovička, J., Ackerman, L., Rejšek, J., Cadmium isotopic composition of biogenic certified reference materials determined by thermal ionization mass spectrometry with double spike correction. *Talanta*, 221, 121389 (2021).
- [5] Wigganhauser, M. et al. Cadmium transfer in contaminated soil-rice systems: Insights from solid-state speciation analysis and stable isotope fractionation. *Environ. Pollut.* 269, 115934 (2021)
